# Supplementary material
Source: PubMed Central journal article supplement (PMC4230531)
Supplement: NIHMS597979-supplement-Supp_Tables.pdf [file NIHMS597979-supplement-Supp_Tables.pdf]

## DATA SUPPLEMENT

### Supplementary Tables

|                     | All<br>RASopathies | NF1             | CS             | NS              | CFC           | ASD               | Unaffected<br>Siblings |
|---------------------|--------------------|-----------------|----------------|-----------------|---------------|-------------------|------------------------|
| % Male              | 47.6               | 38.3            | 52.3           | 53.8            | 51.9          | 72.5 <sup>a</sup> | 55.5                   |
| % Female            | 52.4               | 61.7            | 47.7           | 46.2            | 48.1          | 27.5 <sup>a</sup> | 44.5                   |
| Age min-Age Max     | 1-73               | 1-73            | 2-32           | 2-49            | 2-27          | 1-57              | 1-61                   |
| Age (mean $\pm$ SD) | 14.2 $\pm$ 13.6    | 18.9 $\pm$ 16.1 | 12.4 $\pm$ 8.5 | 14.1 $\pm$ 12.5 | 8.7 $\pm$ 6.1 | 11.4 $\pm$ 10.0   | 12.7 $\pm$ 9.6         |

**Supplementary Table 1. Age and gender distribution in study sample.** Shows the percentage of male and females in each sub-sample as well as the age range, mean, and standard deviation.

<sup>a</sup>Two-tailed p-value for Fisher Exact test is given to show significant difference in the number of males and females in the idiopathic ASD sample,  $p < 0.001$ . There were no significant differences between males and females in the RASopathies or unaffected siblings of RASopathy probands.

|                 | <b>Males/Females</b> | <b>Male SRS Mean<br/>Mean (SD)</b> | <b>Female SRS Mean<br/>Mean (SD)</b> | <b>p-value</b> |
|-----------------|----------------------|------------------------------------|--------------------------------------|----------------|
| All RASopathies | 100/118              | 66 (16)                            | 61 (16)                              | 0.018          |
| NF1             | 29/49                | 61 (20)                            | 54 (14)                              | 0.048          |
| CS              | 19/21                | 62 (11)                            | 59 (10)                              | 0.25           |
| NS              | 28/23                | 65 (15)                            | 64 (20)                              | 0.46           |
| CFC             | 24/25                | 76 (14)                            | 73 (13)                              | 0.27           |
| Siblings        | 52/41                | 46 (9)                             | 46 (11)                              | 0.45           |

**Supplementary Table 2. Comparison of male and female mean SRS scores in RASopathy subjects and healthy siblings.** The differences between male and female mean SRS T-scores and standard deviations within each RASopathy group and in unaffected siblings of RASopathy probands are shown. P-values are calculated from one-sided t-tests.
